# Supplementary material for: Low-Temperature Biosurfactants from Polar Microbes
Source: MDPI journal article supplement (doi:10.3390/microorganisms8081183), 2020-08-03
Supplement: s1 [file s1]

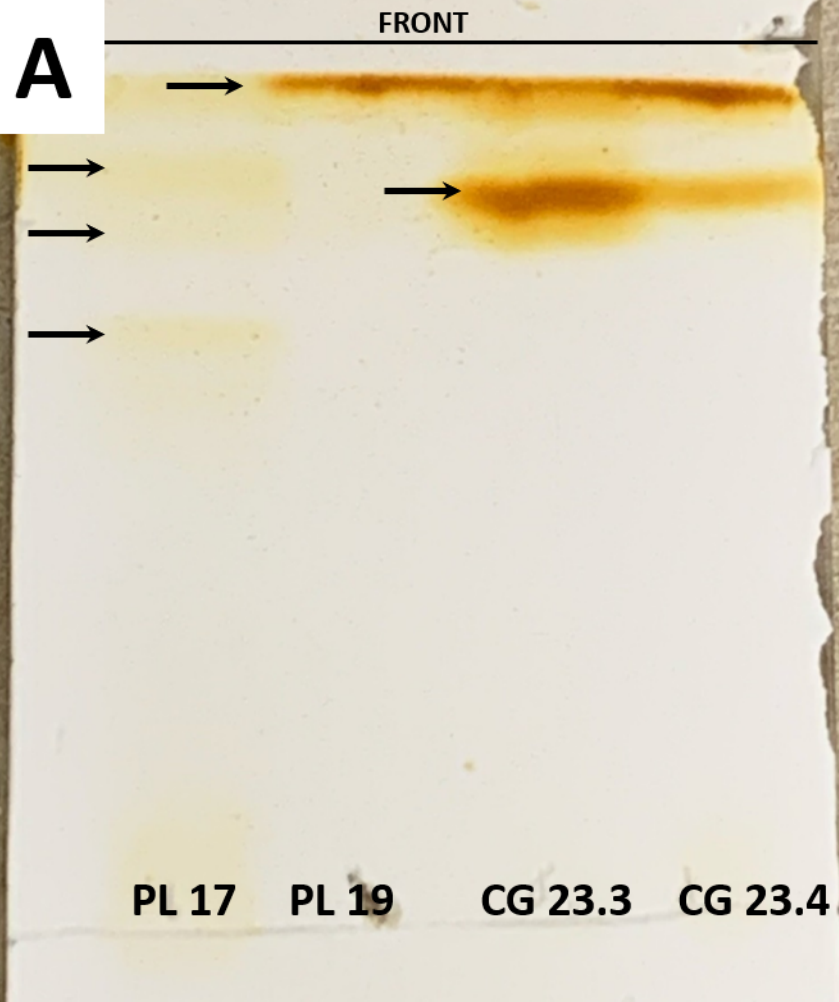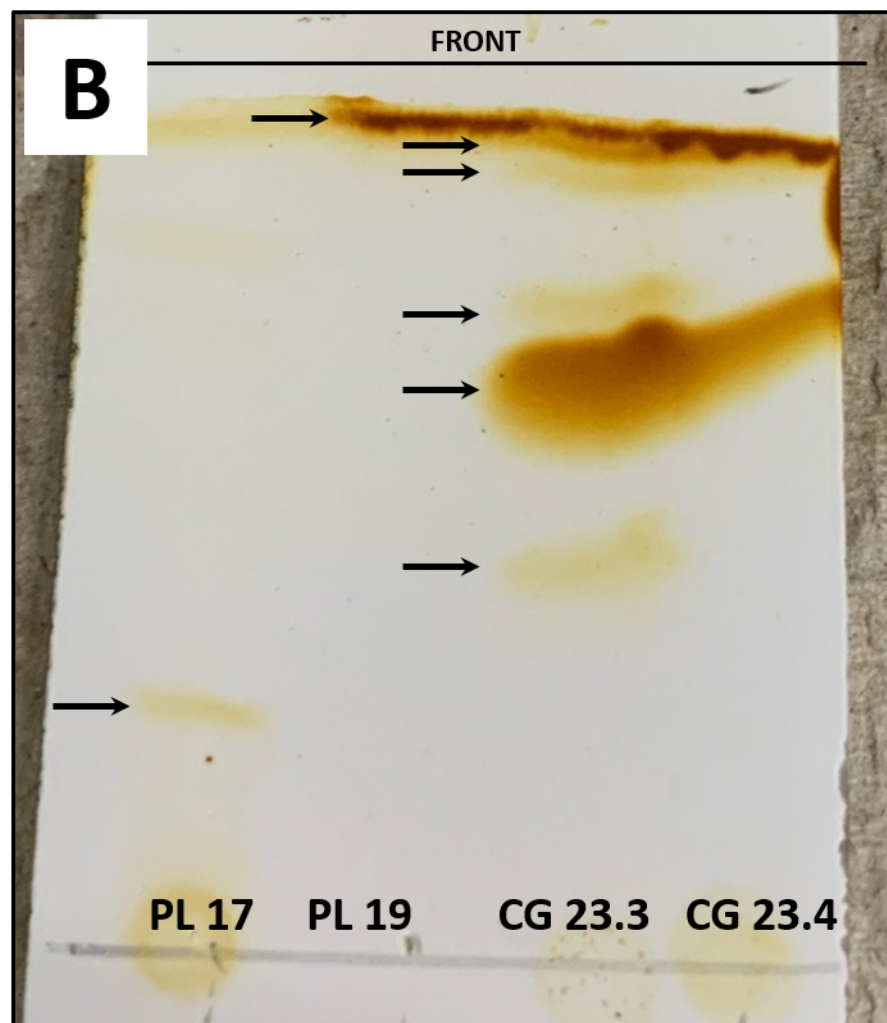

**Supplemental Figure S1:** TLC chromatograms of biosurfactants produced by *Serratia* sp. PL 17, *Psychrobacter* sp. PL 19, *Janthinobacterium* sp. CG 23.3, *Janthinobacterium* sp. CG 23.4. Plates were developed by ascending chromatography in a neutral solvent system of (A)  $\text{CHCl}_3/\text{MeOH}/\text{DIW}$  (65/25/4, v/v/v) and (B)  $\text{CHCl}_3/\text{MeOH}/\text{DIW}$  (90/9/1, v/v/v). Glycolipids were visualized using iodine. Arrows indicate separated glycolipids.
